# Supplementary material
Source: publisher site journal article supplement (https://www.spandidos-publications.com/5212/downloadSupplementary)

Figure S1. Identification of HPV in ESCC cells. (A) The melt curve plot of EC109, KYSE150 and KYSE150-E6E7, the black curve is EC109, the wathet curve is KYSE150, the dark blue curve is KYSE150-E6E7 and the yellow curve is no template, primer only. (B) RT-qPCR results of EC109, KYSE150, KYSE150-E6E7 and no template group, data represent the mean  $\pm$  SD of three independent experiments. (C) The melt curve plot of EC109, EC9706, KYSE150 and KYSE150-E6E7, KYSE180, KYSE180-E6E7, the black curve is EC109, the brown curve is EC9706, the green curve is KYSE150, the red is KYSE150-E6E7, the wathet curve is KYSE180, the dark blue curve is KYSE180-E6E7 and the yellow curve is no template, primer only. (D) RT-qPCR results of EC109, EC9706, KYSE150, KYSE150-E6E7, KYSE180, KYSE150-E6E7 and no template group, data represent the mean  $\pm$  SD of three independent experiments.

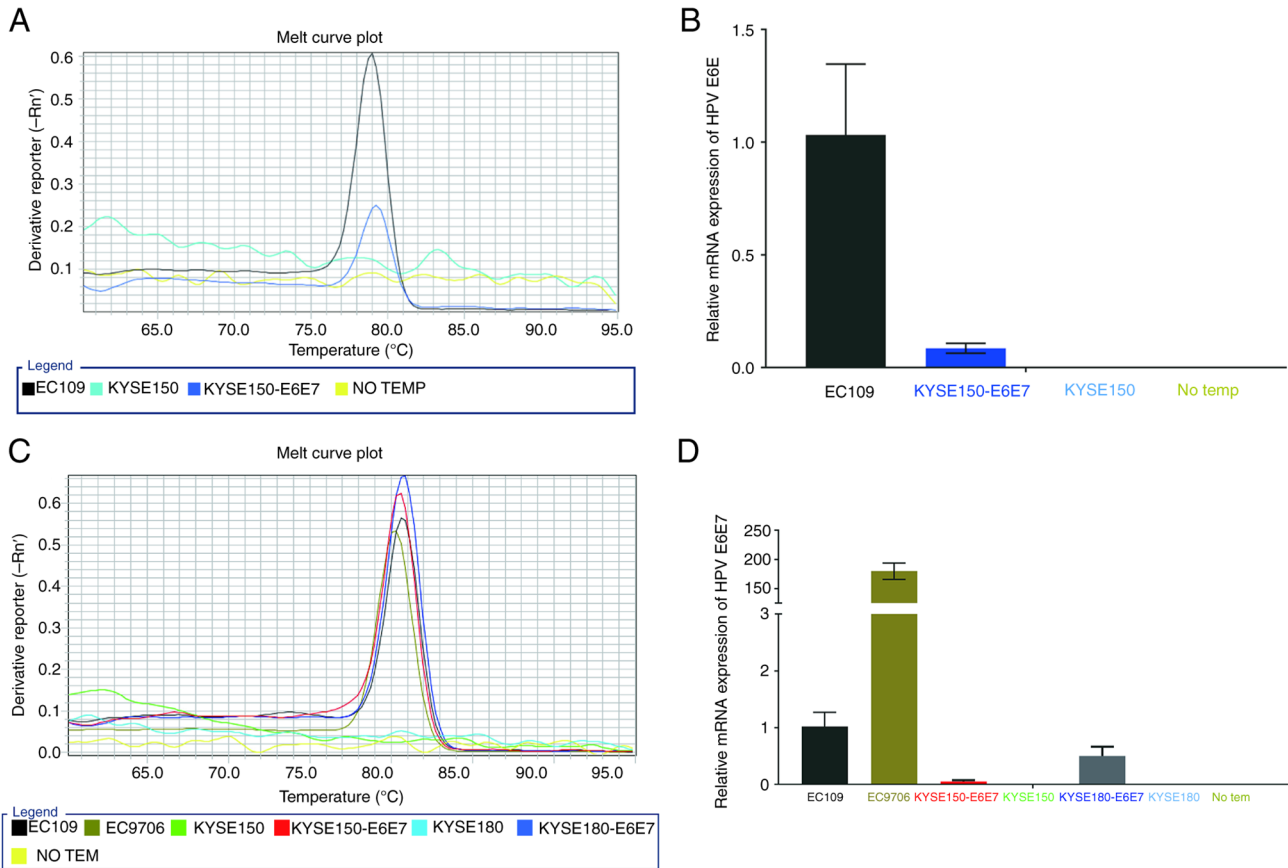

Supplement: Supplementary file 1 [file downloadSupplementary]
